# Supplementary material for: Bupropion-Induced Dystonia in a Patient with Parkinson’s Disease
Source: PubMed Central journal article supplement — J Mov Disord. 2020 Aug 31;13(3):241–3. doi: 10.14802/jmd.20046 (PMC7502294; doi:10.14802/jmd.20046), 2020-08-31
Supplement: jmd-20046-suppl.pdf [file jmd-20046-suppl.pdf]

**Supplementary Table 1.** Abnormal Involuntary Movement Scale (AIMS) in a patient with drug-related dystonia

| Abnormal involuntary movement                                                                                                                                                    | Day 1     | Day 2     | Day 3     |
|----------------------------------------------------------------------------------------------------------------------------------------------------------------------------------|-----------|-----------|-----------|
| <b>Facial and oral movements</b>                                                                                                                                                 |           |           |           |
| 1. Muscles of facial expression<br>e.g., movements of forehead, eyebrows, periorbital area, cheeks, including frowning, blinking, smiling, grimacing                             | 4         | 2         | 1         |
| 2. Lips and periorbital area<br>e.g., puckering, pouting, smacking                                                                                                               | 4         | 2         | 2         |
| 3. Jaw<br>e.g., biting, clenching, chewing, mouth opening, lateral movement                                                                                                      | 4         | 3         | 2         |
| 4. Tongue<br>Increase in movement both in and out, darting in and out                                                                                                            | 3         | 1         | 1         |
| <b>Extremity movements</b>                                                                                                                                                       |           |           |           |
| 5. Upper (arms, wrists, hands, fingers)<br>Include choreic movements, athetoid movements and tremors                                                                             | 3         | 2         | 0         |
| 6. Lower (legs, knees, ankles, toes)<br>e.g., lateral knee movement, foot tapping, heel dropping, foot squirming, inversion and eversion of foot                                 | 3         | 3         | 0         |
| <b>Trunk movements</b>                                                                                                                                                           |           |           |           |
| 7. neck, shoulders, hips<br>e.g., rocking, twisting, squirming, pelvic gyrations                                                                                                 | 0         | 0         | 0         |
| <b>Global judgments</b>                                                                                                                                                          |           |           |           |
| 8. Severity of abnormal movements overall                                                                                                                                        | 4         | 3         | 2         |
| 9. Incapacitations due to abnormal movements                                                                                                                                     | 4         | 3         | 3         |
| 10. Patient's awareness of abnormal movements<br>No awareness: 0<br>Aware, no distress: 1<br>Aware, mild distress: 2<br>Aware, moderate distress: 3<br>Aware, severe distress: 4 | 4         | 3         | 2         |
| <b>Dental status</b>                                                                                                                                                             |           |           |           |
| 11. Current problem with teeth and/or dentures?<br>No/yes                                                                                                                        | No        | No        | No        |
| 12. Are dentures usually worn?<br>No/yes                                                                                                                                         | No        | No        | No        |
| 13. Edentia?<br>No/yes                                                                                                                                                           | No        | No        | No        |
| 14. Do movements disappear in sleep?<br>No/yes                                                                                                                                   | No        | Yes       | Yes       |
| <b>Total</b>                                                                                                                                                                     | <b>33</b> | <b>22</b> | <b>13</b> |

CODE: 0 = none, 1 = minimal, 2 = mild, 3 = moderate, 4 = severe.
